# Supplementary material for: Underwater light environment in Arctic fjords
Source: Copernicus journal article supplement (doi:10.5194/essd-2023-462), 2023-12-08
Supplement: Supplementary file 1 [file essd-2023-462-supplement.pdf]

Supplementary

S1 Shallow monthly climatology  $P$ -functions per site

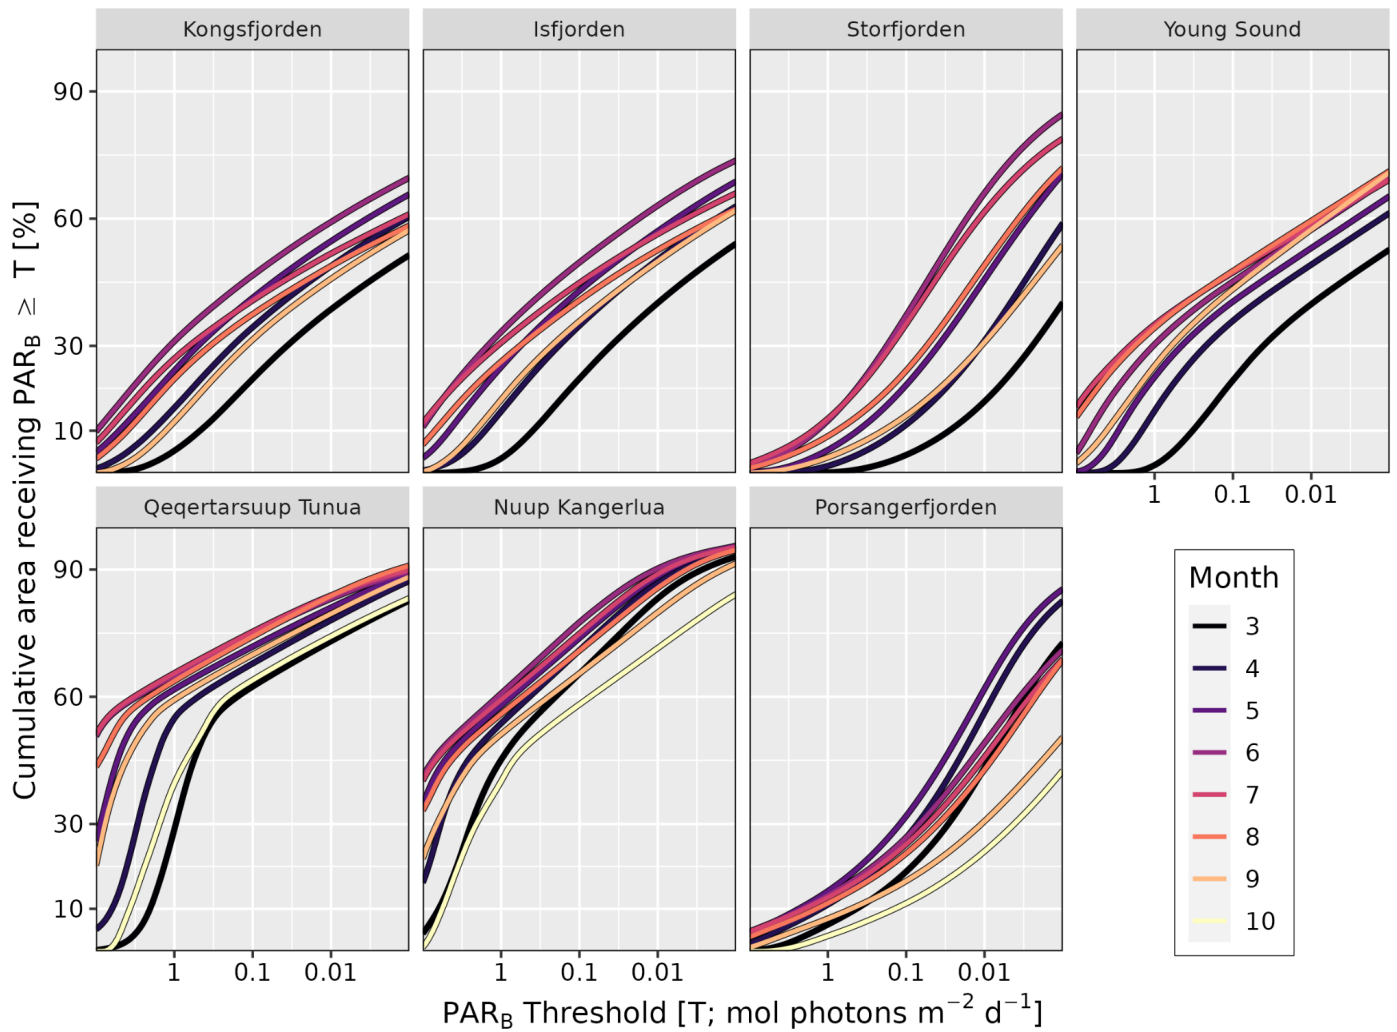

5 **Figure S1:** Shallow (i.e. depth  $\leq 50$  m)  $P$ -functions per site for the monthly climatology of bottom PAR ( $PAR_B$ ). Otherwise the same as Fig. 5.

## S2 Shallow yearly climatology $P$ -functions per site

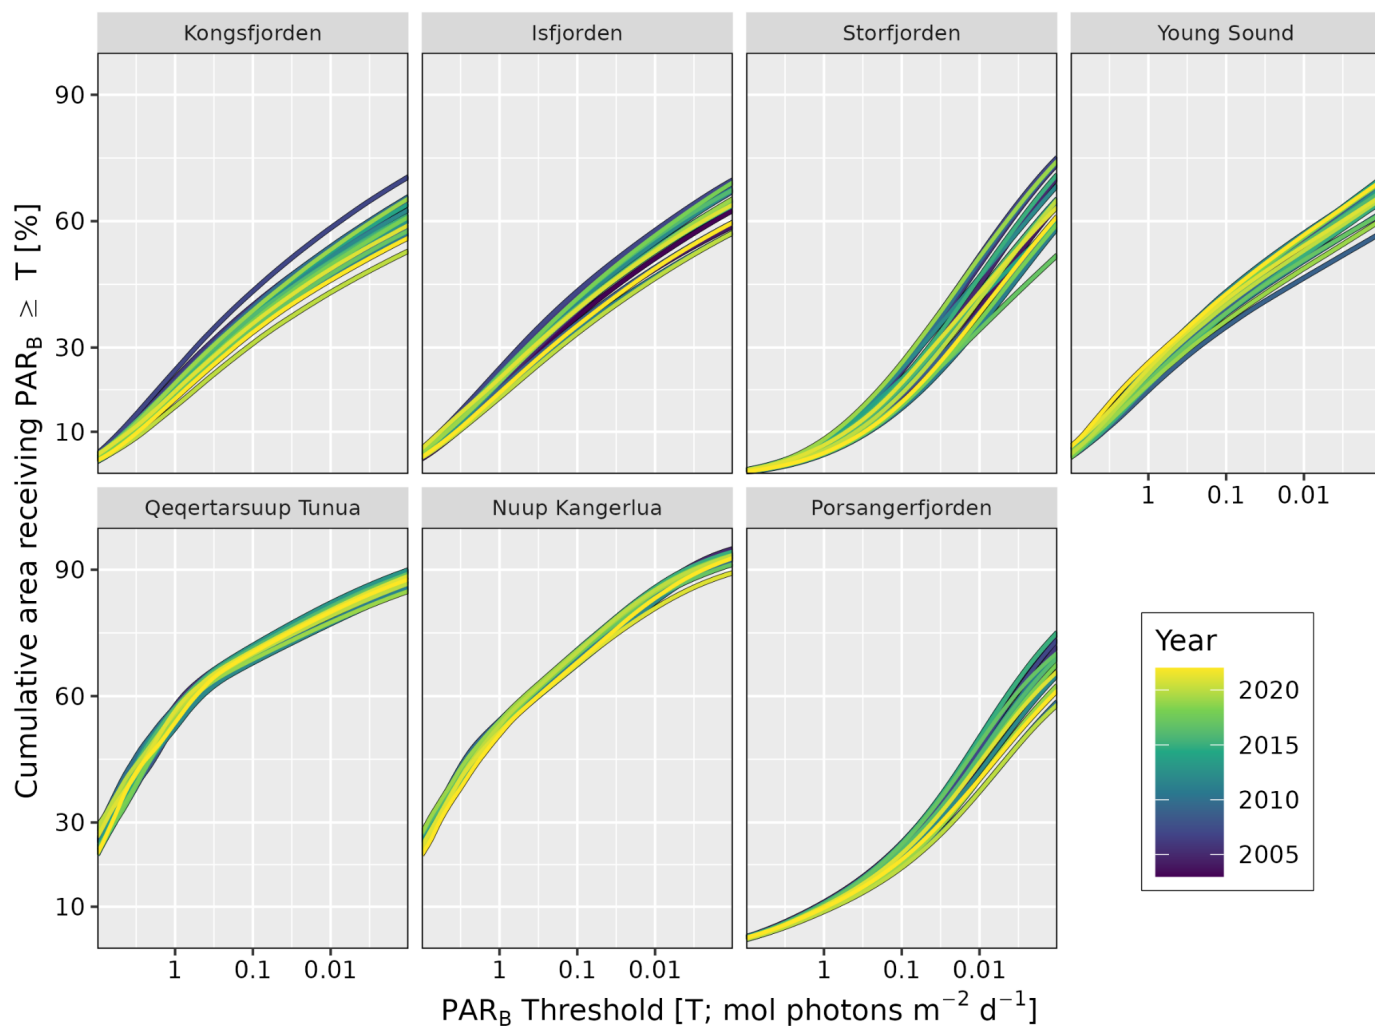

**Figure S2:** Shallow (i.e. depth  $\leq 50$  m)  $P$ -functions per site for annual average bottom PAR ( $PAR_B$ ). Otherwise the same as Fig. 5.
