# Supplementary material for: Underwater light environment in Arctic fjords
Source: Copernicus journal article supplement (doi:10.5194/essd-2023-462), 2023-12-08
Supplement: Supplementary file [file essd-2023-462-RC2-supplement.pdf]

Specific comments:

Page 7 line 154: The fjords of Northern Norway .... Looking at figure 1 and Table 1 there is only 1 fjord in Norway.

Page 15 , 3.2 Bottom values.... The description of table 3 and figure 4 has no additional information than describing the values. Is there a way to provide a clear message to the reader on the meaning of these values?

Pag. 17 line 364: which is figure S1?

Pag. 17 line 372: same for figure S2
